# Supplementary material for: Coastal nitrogen drives respiration quotient in the Southern California Bight
Source: Copernicus journal article supplement (doi:10.5194/bg-22-7915-2025), 2025-12-10
Supplement: Supplementary file 1 [file Final_Supplementary_Moreno_CoastalRespirationQuotient.pdf › Final_Supplementary_Moreno_CoastalRespirationQuotient.pdf]

# Coastal Nitrogen Drives Respiration Quotient in the Southern California Bight

Allison R. Moreno<sup>1,2</sup>, Adam J. Fagan<sup>3</sup>, and Adam C. Martiny<sup>2,3</sup>

## Affiliations:

<sup>1</sup> Department of Ocean Sciences, University of California, Santa Cruz, CA, USA

<sup>2</sup> Department of Ecology and Evolutionary Biology, University of California, Irvine, CA, USA

<sup>3</sup> Department of Earth System Science, University of California, Irvine, CA, USA

## 1. Supplementary Information

### 1.1. Supplementary Figures

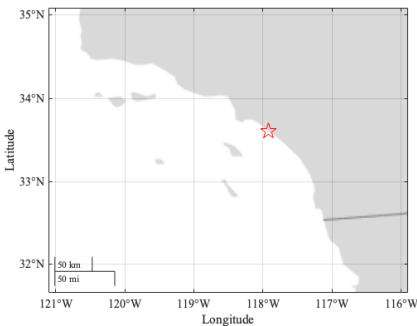

**Figure S1.** Microbes in the Coastal Region of Orange County (MICRO) time-series sampling location at Newport Pier (33.608°N and 117.928°W) in Newport Beach, CA.

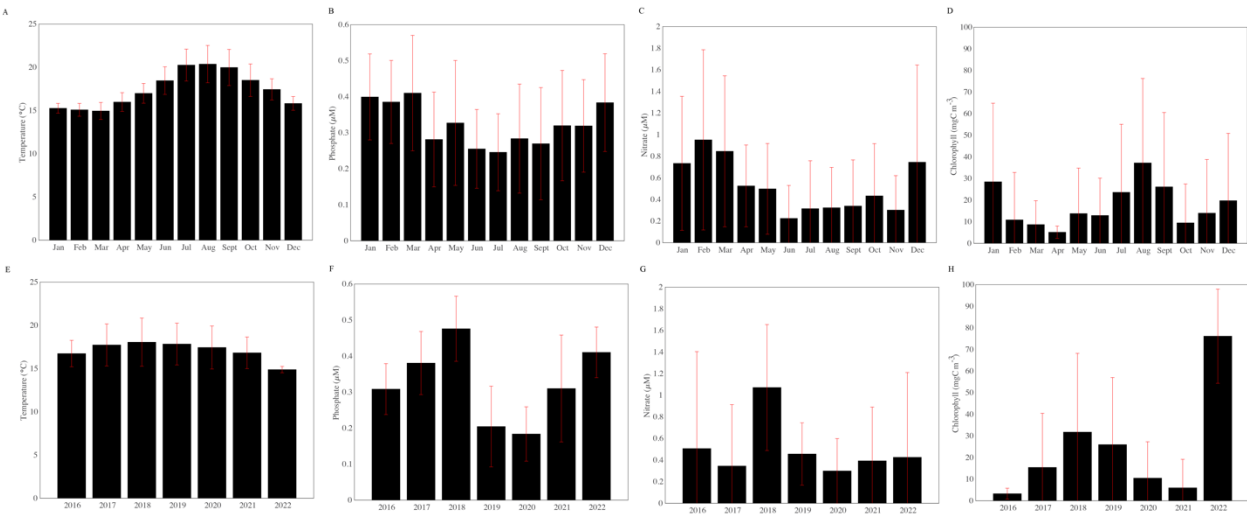

**Figure S2.** Average monthly and annual environmental parameter trends. A/E. Temperature. B/F. Phosphate. C/G. Nitrate. D/H. Chlorophyll. Red lines represent the standard deviation from the average.

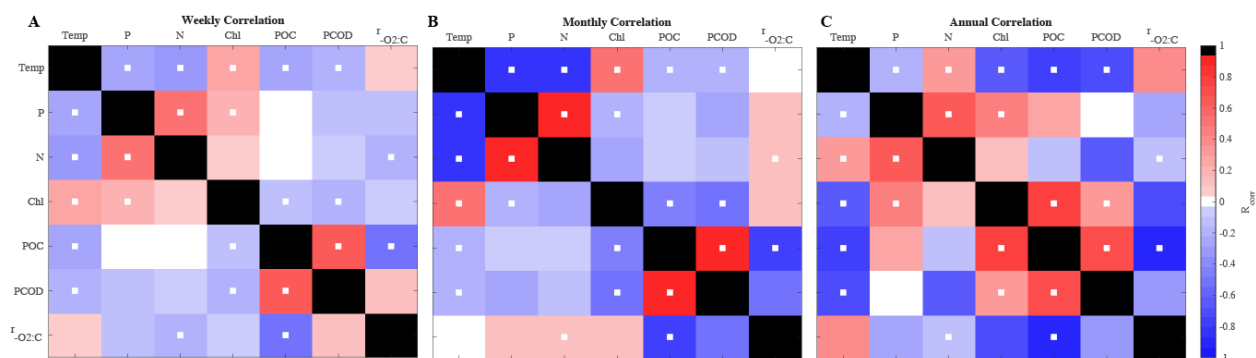

**Figure S3.** Covariations between all physical, chemical, and biological parameters. A. Weekly correlations. B. Monthly correlations. C. Annual correlations. White squares represent statistical significance at p-value < 0.05.

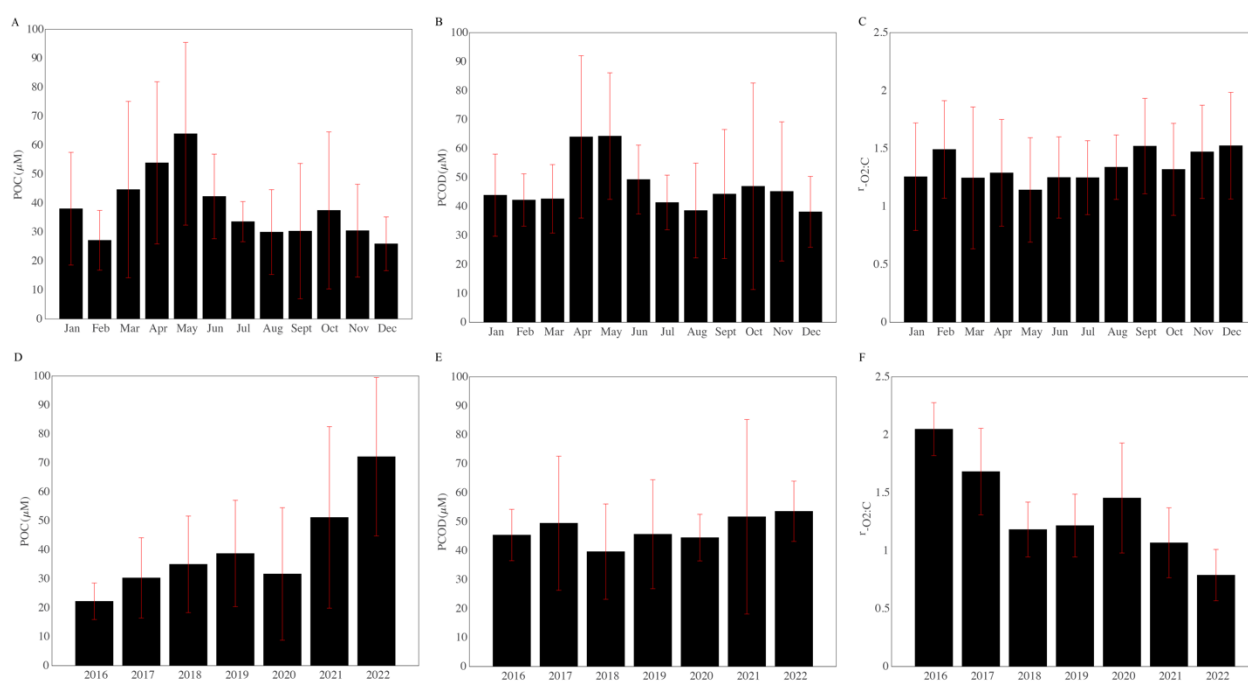

**Figure S4.** Average monthly and annual particulate organic matter and ratio trends. A/D POC concentrations. B/E. PCOC concentration. C/F.  $r_{O_2:C}$ . Red lines represent the standard deviation.

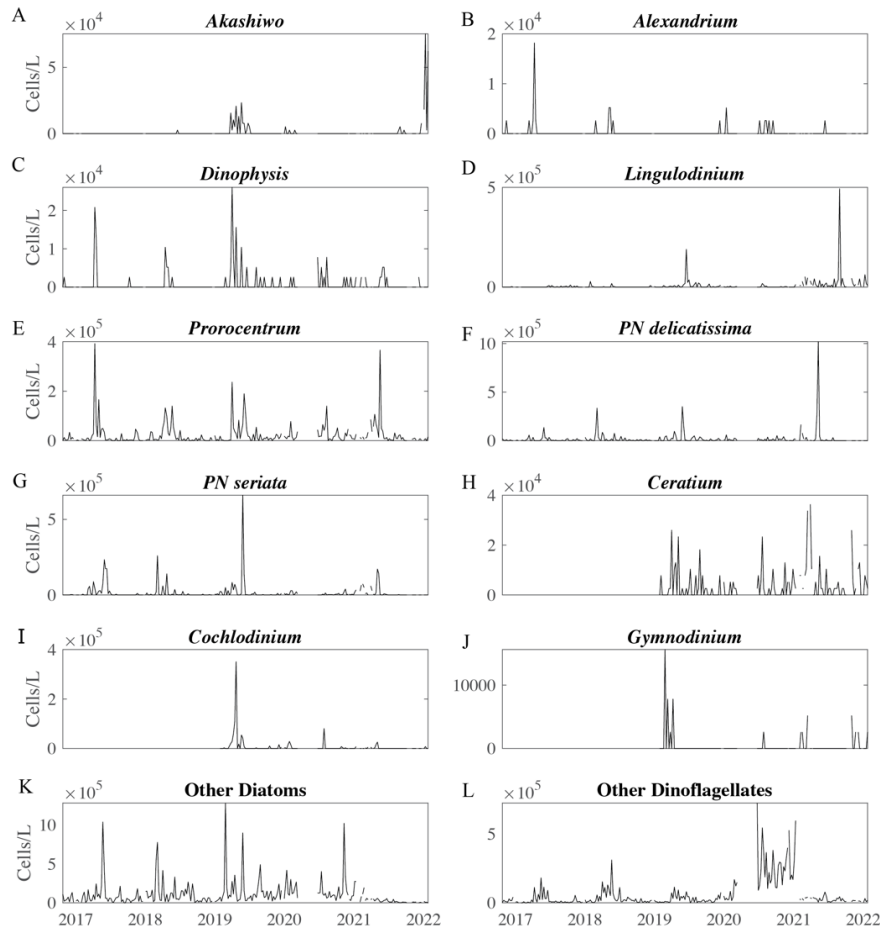

**Figure S5.** Primarily large phytoplankton (diatoms and dinoflagellates) abundance over time.

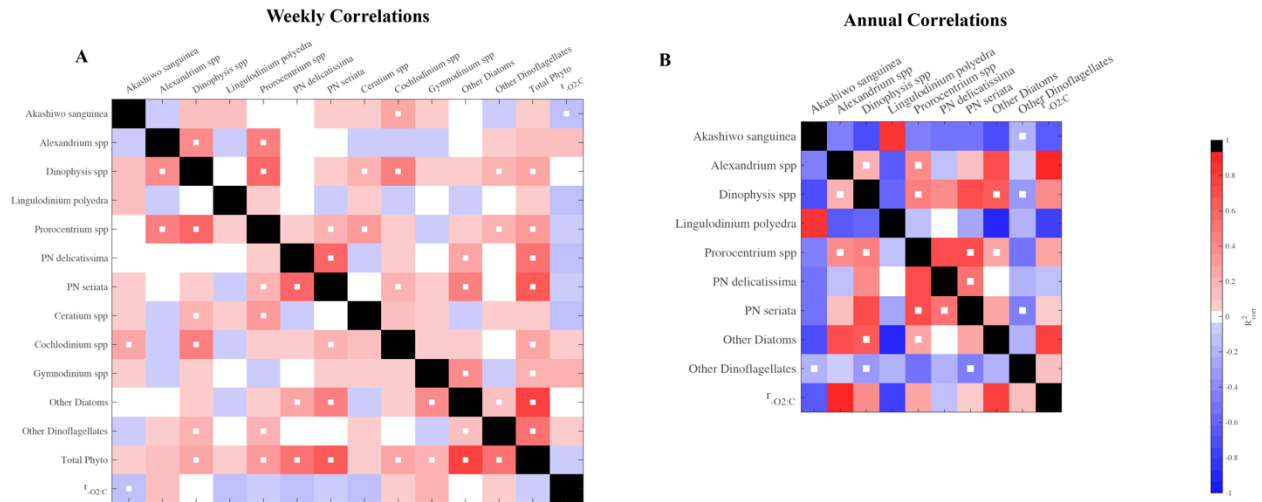

**Figure S6.** Correlations between all large phytoplankton species and  $r_{02:C}$ . A. Weekly and B. Annual correlations. White squares represent statistically significant correlations ( $p\text{-value} \leq 0.05$ ).

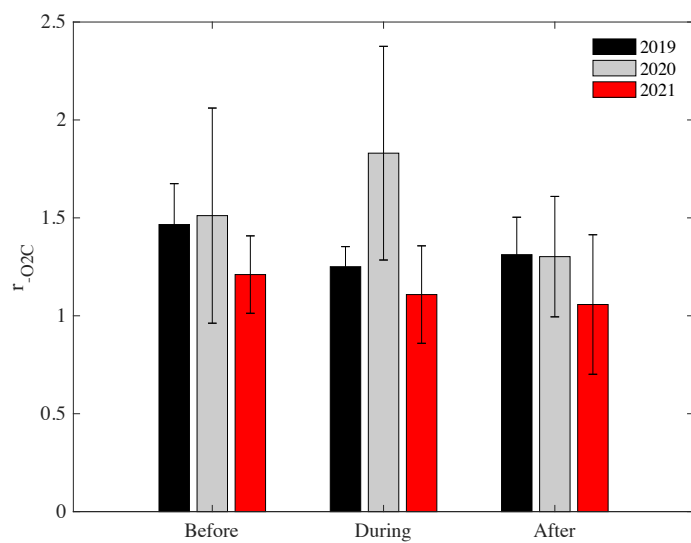

**Figure S7.** Annual differences in  $r_{-O2:C}$  during the oil spill timeframes. Average  $r_{-O2:C}$  in 2019 (black), 2020 (grey), and 2021 (red). Error bars represent the standard deviation.
