# Supplementary material for: Coastal nitrogen drives respiration quotient in the Southern California Bight
Source: Copernicus journal article supplement (doi:10.5194/bg-22-7915-2025), 2025-12-10
Supplement: Supplementary file 1 [file Table S1.xlsx]

## Sheet: Master_All
Month	Day	Year	Date	Temperature (˚C)	Chlorophyll (mg/m3)	Salinity (ppt)	Nitrate (µmol/L)	Nitrate (µmol/L)	Nitrate (µmol/L)	Nitrate (µmol/L)	Nitrate (µmol/L)	Phosphate (µmol/L)	Phosphate (µmol/L)	Phosphate (µmol/L)	Phosphate (µmol/L)	Phosphate (µmol/L)	Phosphate (µmol/L)	POC (µmol/L)	POC (µmol/L)	POC (µmol/L)	POC (µmol/L)	POC (µmol/L)	POC (µmol/L)	PCOD (µmol/L)	PCOD (µmol/L)	PCOD (µmol/L)	PCOD (µmol/L)	PCOD (µmol/L)	PCOD (µmol/L)
10	26	2016	2016-10-26	18.2551	2.7758	33.3157	0.134328	0.181818	0.179104			0.288809	0.299907	0.285521				17.4854	18.3181	15.8201	22.2037	26.3669	21.0935	46.557	51.9706
11	2	2016	2016-11-02	17.0257	2.46572	33.2715	0.0447761	0.0151515	0.0447761			0.315404	0.356902	0.358438				20.816	21.9262	19.9833	25.8118	30.2526	21.9262	44.3013	44.3013
11	9	2016	2016-11-09	18.2863	2.26172	33.3436	-0.0597015		-0.0149254			0.224979	0.248093	0.243854				18.0405	16.3752	17.2079	16.3752	18.3181	14.1549	30.3162	38.4366
11	16	2016	2016-11-16	18.6887	10.0967	33.3517	0.0597015	0.363636	-0.0298507			0.246255	0.263637	0.249062				20.2609	22.4813	18.5956	19.4283	20.816	18.3181	44.3013	37.0832
11	23	2016	2016-11-23	17.4331	1.71364	33.2618	0.298507	0.409091	0.238806			0.331362	0.341358	0.316771				18.5956	16.0977	15.5426	16.3752	16.3752	14.71	44.7524	36.632
11	30	2016	2016-11-30	16.4267	2.20324	33.2861	0.0223881	0.030303	-0.0298507			0.251574	0.263637	0.254271				18.8732	24.4241	18.0405	19.1507	22.4813	17.4854	33.023	44.7524
12	7	2016	2016-12-07	16.2599	1.43212	33.3542	-0.0149254	-0.0606061	-0.0895522			0.240936	0.248093	0.233437				16.0977	13.0447	12.7671	16.6528	14.9875	13.5998	40.8591	29.8022	33.0015	37.2514	22.3674	25.8589
12	14	2016	2016-12-14	16.3085	3.18244	33.2811	-0.104478	-0.0147059	-0.0746269				0.294725	0.264688				27.7546	30.5301	24.4241	29.4199	30.8077	28.3097	56.722	57.2027	53.7756	46.7246	69.8746	57.4299
12	21	2016	2016-12-21	14.3674	4.36292	33.0315	1.97015	2.10294	2.20896			0.336681	0.470891	0.446979				22.2037	23.3139	22.2037	33.8607	33.8607	33.3056	47.1081	76.9112	37.3233	89.9707	45.4462	51.899
12	28	2016	2016-12-28	14.3251	2.3066	33.039	2.0597	2.32353	2.50746			0.416468	0.444984	0.431354				31.6403	32.4729	29.6975	34.9709	39.1341	37.1912	61.0483	62.9711	60.8266	43.4341	81.3975	52.3599
1	4	2017	2017-01-04	14.7345	3.12668	33.2028	0.358209	0.544118	0.626866			0.320723	0.325813	0.311563	0.464			26.922	23.0364	23.0364	28.5873	26.922	24.7016	38.4556	43.4341	68.4919	64.2993	62.7442	42.1374
1	11	2017	2017-01-11	15.1237	2.03324	33.0439	0.0149254	0.132353	0.268657	0		0.288809	0.310269	0.290729	0.464			18.3181	16.3752	16.3752	19.4283	18.3181	16.3752	44.8923	38.3964	35.5657
1	18	2017	2017-01-18	14.7166	1.84284	33.0422	0.0895522		0.0298507			0.326043	0.362083	0.327188				21.0935	22.4813	19.7058	22.2037	20.2609	21.6486	43.4774	37.7409	36.1462	67.5873	35.1952	28.6331
1	25	2017	2017-01-25				3.77414	4.78333	0.755			0.756894	0.792135	0.775104	0.518			32.7505			38.3014			57.3678	66.126	64.4883	58.7524	64.2993	62.7442
2	1	2017	2017-02-01	14.9951	3.98212	32.8923	2.09808	2.23333	0			0.352638	0.362083	0.358438	0.486			18.8732			21.0935			57.6834	35.0908	37.7933	40.6137	46.368	40.3761
2	8	2017	2017-02-08				0.816394	0.733333	0			0.384553	0.382808	0.368854	0.469			19.9833			17.4854			45.1854	75.4692	53.3055	24.6315	36.6888	35.767
2	15	2017	2017-02-15	15.3108	2.86114	33.06	1.06992	1.31667	0.477			0.343419	0.297619	0.305732	0.451			17.763			23.0364			31.7259	36.0521	30.2723	33.0927	51.899	80.0147
2	22	2017	2017-02-22	15.1478	2.56882	32.9054	1.25301	1.25	0			0.41961	0.321429	0.375796	0.455			90.7577			98.2515			141.324	171.48	180.31	224.499	217.054	148.889
3	1	2017	2017-03-01	14.4182	2.75848	33.1809	4.68963	5.8	0.419			0.505324	0.392857	0.452229	0.502			24.4241			32.1954			51.0558	50.0994	30.1377	56.0792	54.8957	19.0611
3	8	2017	2017-03-08	14.8906	2.89072	33.2259	1.15094	1.45	0			0.314848	0.285714	0.292994	0.422			27.4771			28.8648			47.4025	46.6112	53.6756	51.9692	50.9715	50.4449
3	15	2017	2017-03-15	15.382	4.07566	33.2058	0.358491	0.466667	0			0.243419	0.214286	0.248408	0.433			27.4771			26.922			62.4726	61.0001	69.8291	56.9925	55.7678	50.9064
3	22	2017	2017-03-22	16.2915	3.8947	33.2202	0.207547	0	0			0.262467	0.238095	0.248408	0.423	0.425		16.9303			18.8732			34.6157	34.4025	34.2915	33.2457	33.0944	52.291
3	29	2017	2017-03-29	15.4461	8.91808	33.2653	2.30189	0.292	0.45			0.427083	0.309524	0.33758	0.464	0.465		58.8399			53.2889
4	5	2017	2017-04-05	15.0186	5.19274	33.3313	2.0566	1.07	0.431			0.302083	0.25	0.261146	0.422	0.461		33.028			36.081			87.5895	84.9815	64.2907	71.1493	69.2846	79.0596
4	12	2017	2017-04-12	15.7926	9.541	33.2468	0.118644	2.64	0			0.260417	0.202381	0.203822	2.57	0.512		77.713			47.738			124.103	129.414	177.369	93.5742	109.603	138.546
4	19	2017	2017-04-19	16.073	7.56088	33.2368	0.20339	0	0			0.307292	0.208333	0.22293	0.452	0.419		111.574			72.1621			127.803	105.457	194.207	115.777	116.053	117.497
4	26	2017	2017-04-26	15.7233	8.04982	33.2202	0.355932	1.17	0			0.197917	0.14881	0.159236	0.58	0.394		51.0686			36.081			113.927	77.3533	109.078	79.2351	77.814	71.6584
5	3	2017	2017-05-03	17.0924	4.62202	33.4797	1.0339	0.37	0			0.208333	0.172619	0.22293	0.395	0.403		52.7338			52.1787			92.6491	74.1283	92.7069	83.8606	73.6676	81.9488
5	10	2017	2017-05-10	17.1503	2.66974	33.4243	0.186441					0.177083	0.154762	0.152866	0.398			21.6486			26.6445			46.8565	46.4857	44.997	47.7816	51.0928	66.981
5	17	2017	2017-05-17	18.3731	3.89818	33.4721	0.182	0	0			0.166667	0.10119	0.0955414	0.393	0.341	0.501	53.844			40.5218			125.49	70.4427	79.6101	143.067	64.4534	82.8843
5	24	2017	2017-05-24	17.665	7.2703	33.4244	0	0	0			0.114583	0.113095	0.121019	0.39	0.493	0.36	51.6236			54.1216			121.79	73.6676	120.304	74.6096	69.0605	90.3682
5	31	2017	2017-05-31	16.0389	8.7406	33.4233	0	0	0			0.177083	0.154762	0.191083	0.488	0.524	0.409	58.2848			53.5665			67.6713	74.589	65.746	91.7714	54.5215	59.9733
6	7	2017	2017-06-07	17.7913	10.0421	33.4168	0	0	0			0.244792	0.181818	0.167904	0.483	0.39	0.39	16.0977			19.7058			35.0279	35.0163	30.8196	29.5261	39.6604	36.8355
6	14	2017	2017-06-14	18.8157	3.3292	33.4943	0	0	0			0.119792	0.142857	0.131976	0.408	0.294	0.368	26.6445			24.4241			49.2408	51.735		46.0314	40.1248	46.5534
6	21	2017	2017-06-21	19.1054	4.24444	33.4425	0	0	0			0.161458	0.181818	0.161916	0.467	0.357	0.393	52.5366			45.5724			35.0279	54.9859	57.1968	45.1144	49.8774	59.9733
6	28	2017	2017-06-28	17.9306	4.2601	33.3757	0	0	0			0.166667	0.103896	0.0960479	0.426	0.522	0.349	35.6236	39.849	43.2706	41.0487			39.1542	43.3757	47.0161	46.0314	47.0909	46.5534
7	5	2017	2017-07-05	18.5219	4.86736	33.3612	0	0	0			0.109375	0.12987	0.114012	0.403	0.36	0.373	42.3516	47.7328	48.1962	52.4744			38.2372	42.9113	40.0748	32.277	42.9113	46.0906
7	12	2017	2017-07-12	21.5967	8.99986	33.3559	8.85	0	0			0.161458	0.175325	0.155928	0.487	0.39		30.9794	38.1591	35.068	32.6766	26.2262	33.285	29.5261	45.6977	35.91	27.6922	35.4808	36.3727
7	19	2017	2017-07-19	22.5812	9.0799	33.377	0	0	0			0.427	0.378	0.362				24.1179	26.6246	47.0153	46.7922	47.4331	30.8106	49.2408	43.8401	33.5962	36.4033	63.8096	36.8355
7	26	2017	2017-07-26	22.3896	17.1326	33.4901	0	0	0			0.496	0.37	0.348				22.5131	21.5097	24.7397	22.3244	26.7587	27.2749	34.0463	42.9563	38.9627	33.2286	26.7424	30.2687
8	2	2017	2017-08-02	20.4922	30.6002	33.4088	0	0	0			0.456	0.375	0.369				29.2106	20.7339	28.0266	22.2917	21.2241	31.1466	53.3801	40.1115	49.7597	26.973	17.8273	30.513
8	9	2017	2017-08-09	21.6423	84.6707	33.4255	0	0	0			0.336	0.479	0.37	0.439			26.2992	23.262	22.4623	26.6913	20.8133	22.333	27.1958	28.3381		31.8977	26.7424	27.0437
8	16	2017	2017-08-16	22.7634	85.9096	33.5357	0.996	0	0	0		0.547	0.454	0.354				16.6156	17.5836	17.6554	15.3706	18.2539	20.2738	27.9161	23.991	21.1244	24.2036	28.7877	23.0552
8	23	2017	2017-08-23	19.0485	83.1708	33.4026	0	0	0			0.471	0.453	0.347				23.463	25.3954	24.8734	24.0191	21.8522	23.0298	41.2164	33.3862	51.2091	43.0543	27.465	34.1854
8	30	2017	2017-08-30	18.3962	81.3682	33.3345	0	0	0			0.481	0.523	0.407				17.4207	18.3413	19.7141	17.0512	20.6029	19.3897	45.3637	27.7841	26.7575	43.4774	47.2235	47.8819
9	6	2017	2017-09-06	22.2233	71.1213	33.434	0	0	0			0.378	0.455	0.395				22.5697	22.8219	23.8616	24.2284	21.5435	24.6372	37.9999	36.2784	34.6455	30.8523	32.0124	27.0925
9	13	2017	2017-09-13	15.6943	80.0006	33.2695	0	0	0			0.462	0.464	0.494				21.7517	15.9886	20.1244	16.5783	18.2678	17.7857	45.0216	36.6868		33.6723	35.9322
9	20	2017	2017-09-20	17.2895	9.36004	33.2889	1.77	0.136				0.582	0.471	0.437				19.1209	18.9496	21.3621	19.5768	22.3278	21.5545	58.5672	30.9824	26.3617	28.3506	51.1496	36.4859
9	27	2017	2017-09-27	20.4394	9.64366	33.3691	0.0474					0.382	0.398	0.379				24.9523	24.1437	28.3694	23.4579	26.5423	26.3881	62.8112	48.6459	42.7182	33.337	30.6184	30.4923
10	4	2017	2017-10-04	20.8508	12.4764	33.4072	0	0	0			0.438	0.384	0.48				22.0149	21.7845	23.4808	25.73	30.5215	24.2181	27.1958	42.2791	23.7452	28.7974	40.3417	41.9408
10	11	2017	2017-10-11	20.6784	18.7943	33.4122	0	0	0			0.425	0.413	0.481				21.7676	16.8669	18.5208	20.5679	20.6589	21.8102	58.0957	37.7409	32.8601	55.0011	30.1979	32.8051
10	18	2017	2017-10-18	20.0136	2.19124	33.3753	0	0	0			0.426	0.43	0.515				24.5514	23.3119	25.4565	25.8776	36.1024	20.7692	36.7943	38.4425	41.2555	41.2142	28.1209	35.7972
10	25	2017	2017-10-25	19.7836	2.4766	33.3922	6.73					1.18	0.418	0.391				24.6854	26.4662	23.6507	20.5671	24.163	38.4613	27.8911	36.119	32.9662	40.4509	28.3381	35.773
11	1	2017	2017-11-01	19.663	2.46964	33.453	0.0281					0.409	0.494	0.488				14.8875	15.2313	22.9744	16.7499	19.8984		25.2431	23.0665	20.1331	23.0249	23.9854	18.7509
11	8	2017	2017-11-08	18.4036	5.07442	33.3578	0.394	0.144	0.0628			0.495	0.52	0.455	0.449	0.469	0.448	19.3187	35.2989	16.0433	42.1494	30.4523	38.767	57.0839	42.0137	48.01	34.2798	41.6481	56.9872
11	15	2017	2017-11-15	16.8239	6.3916	33.3234	0.84	0.0355	0.0586	0.0616		0.498	0.484	0.621	0.45	0.475	0.454	37.6206	31.4408	39.7499	33.9422	36.3056	25.8971	53.8517	69.0335	38.4933	53.1631	43.4066	70.9934
11	22	2017	2017-11-22	16.3773	3.85468	33.3398	0.0484	0.146				0.474	0.445	0.428	0.484	0.426	0.431	46.8477	29.4496	25.3166	25.6745	24.6422	33.0644	51.9654	46.7494	52.5762	33.1377	33.3903	39.8849
11	29	2017	2017-11-29	16.6018	5.2693	33.3546	0	0	0			0.498	0.497	0.46	0.496	0.482	0.487	29.5546	41.8729	37.8849	39.2729	41.5256	12.3063	44.4206	61.4474	48.3514	40.7705	42.3651	54.2256
12	6	2017	2017-12-06	15.0966	5.18926	33.4267	0.872	0.0672	0.0746	0.0901		0.501	0.491	0.429	0.438	0.455	0.476	16.5202	17.1771	17.9773	18.805	19.0411	13.6579	51.9706	51.5194
12	13	2017	2017-12-13	16.7275	5.65558	33.5134	0.286					0.389	0.399	0.419	0.427	0.41		18.0137	17.3797	19.2476	22.1528	13.7133	10.6421	23.2962	41.5847	35.5657	35.7025	30.1979	55.35
12	20	2017	2017-12-20	16.993	6.12538	33.5071	0	0	0			0.396	0.453	0.431	0.44	0.41	0.435	10.7686	13.0213	12.4309	9.36629	8.38655		25.3675	19.6116		21.0069	15.9728	20.2663
12	27	2017	2017-12-27	16.5822	1.8328	33.5529
1	3	2018	2018-01-03	16.4119	2.88028	33.5386
1	10	2018	2018-01-10	16.2663	4.582	33.3771	1.2	1.93	1.14			0.542	0.581	0.51				21.7845	21.2626	25.1441	24.3171	46.0864	22.2297	36.6215	27.465	26.3637	30.2906	28.1099	50.384
1	17	2018	2018-01-17	16.5302	4.0339	33.2463	1.05	0.974	0.499			0.477	0.494	0.425				33.5244	36.6694	38.2278	48.6744	40.4788	51.435	59.9819	63.344	65.2509	47.1898	45.2285	53.9697
1	24	2018	2018-01-24	15.2714	8.82064	33.1668	1.47	0.179	0.923			0.462	0.525	0.414				45.5227	46.822	50.3583	51.5204	33.3018	37.4362	46.9815	50.6359	44.09	61.1939	52.5868	63.0299
1	31	2018	2018-01-31	15.2621	5.04658	33.0794	1.11	1.12	0.561			0.447	0.431	0.423				40.1049	37.9471	38.6813	39.951	15.0748	37.2038	50.5424	53.0457		51.3252	48.8722	53.0495
2	7	2018	2018-02-07	16.1896	2.3635	33.4934	0.922	0.628	0.752			0.5	0.393	0.46				34.1797	26.745	15.3212	16.6145	25.0201	30.3425	38.6226	31.0938	45.9613	41.6578	43.7436	42.7079
2	14	2018	2018-02-14	16.3086	2.9551	33.5246	0.683	0.832	0.956			0.527	0.446	0.438				22.7709	24.2993	26.511	27.7548	30.4978	25.0627	55.4606	35.2081	36.946	33.5948	32.931	50.9868
2	21	2018	2018-02-21	14.9318	3.44404	33.4002	3.19	2.73	4.23			0.589	0.596	0.602				34.6546	31.8205	39.0461	31.7309	27.584	38.7953	37.7084	44.8725	32.3465	43.7436	46.3936
2	28	2018	2018-02-28	13.8074	5.55466	33.4286	1.33	3.08	3.77			0.604	0.543	0.586				46.5288	50.5396	43.8323	42.1969	49.2962	44.5039	63.7314	35.2081	30.0445	52.0605	49.3831	75.5801
3	7	2018	2018-03-07	14.1167	5.69734	33.496	0.965	0.768	0.616			0.509	0.468	0.411				57.0354	55.9672	40.501	48.757	52.9472	21.8537	36.9904	43.8404	32.4491	30.1607	54.6631	43.891
3	14	2018	2018-03-14				0.375		0.762			0.414	0.514	0.48				31.2211	31.1806	24.4666	33.4425	32.6696	38.8076
3	21	2018	2018-03-21	14.4802	12.144	33.3939
3	28	2018	2018-03-28	14.3117	28.9176	33.347	7.21	1.8				0.617	0.615					41.2842	47.3716	38.0194	70.2964	74.7379	37.6116	52.7488	60.2853	59.7542	60.2806	43.4333	50.0149
4	4	2018	2018-04-04	14.8068	9.60538	33.4607
4	11	2018	2018-04-11	17.7822	0.06844	33.4716	1.3	0.615	0.559			0.41	0.451	0.456				39.849	87.4369	96.7667	75.556	52.4425	78.9604	81.3501	71.3508	75.0619	72.0798	67.2331	61.2792
4	18	2018	2018-04-18	13.1993	0.07192	33.5454	6.32	3.96	4.23			0.663	0.65	0.637				43.2706	32.4337	59.2885	51.1466	52.8177	58.8688	66.5016	62.5827	61.597	66.2173	58.9942	79.7635
4	25	2018	2018-04-25	16.029	0.06844	33.5447	0.389	0.841	1.27			0.407	0.422	0.372				72.1599	83.104	61.1562	79.0275	84.6813	33.5833	62.0652	75.908	72.1934	71.2407	66.317	70.0022
5	2	2018	2018-05-02	16.1109	0.07192	33.5286	1.27	0.959	0.74			0.485	0.567	0.528				58.0979	46.2984	59.8425	55.0407	30.5939		63.7576	64.4102	88.408	40.1427	41.2355	37.6309
5	9	2018	2018-05-09	16.1391	0.09454	33.4757	1.01		0.925			0.519	0.554	0.492				46.7544	52.9992	52.0689	50.2084	46.2193	47.949	53.6361	62.1232	78.6433	54.3439	55.3328	62.1003
5	16	2018	2018-05-16	16.4831	0.06844	33.4324	7.16	5.57	6.34			0.776	0.753	0.798				62.556	56.0029	113.969	74.8503			56.7416	55.2308	51.9221	70.784	70.0013	62.4256
5	23	2018	2018-05-23	16.8756	5.41198	33.6567	1.11	0.898	0.979			0.467	0.465	0.486				68.4197	65.2198	70.5943	18.2108	79.8488	90.1943	58.8549	55.4648	56.3876	67.555	58.6654	73.5348
5	30	2018	2018-05-30	17.3419	5.77042	33.6319	2.08	0.494	1.14			0.5	0.531	0.488				52.5778	92.59	52.3307	96.032	75.7652	49.8876	75.382	75.4357	74.151	51.2742	47.4725	51.3054
6	6	2018	2018-06-06	18.4062	7.03018	33.6541
6	13	2018	2018-06-13	20.4866	23.2661	33.4039	0.576		0.779			0.363	0.504	0.382				35.9597	33.8964	42.3665	36.4941	29.3697	40.4278	36.8187	37.7633	39.0796	32.7089	34.3553	36.7219
6	20	2018	2018-06-20	19.4371	76.0421	33.2538	0.779	0.827	0.757			0.469	0.48	0.451				63.899	44.9535	53.4908	47.3833	36.0099	35.7414	51.0504	72.7124	71.4182	75.3162	40.4152	49.3106
6	27	2018	2018-06-27	19.981	5.55466	33.769
7	4	2018	2018-07-04	19.8432	11.0757	33.784
7	11	2018	2018-07-11	23.3027	87.058	33.8068	0.887	0.668	0.864			0.371	0.333	0.361				20.6392	19.1711	25.3267	21.9621	21.3424	21.4586	20.297	16.4201	40.5336	18.3058	16.4667	18.0883
7	18	2018	2018-07-18	22.2802	87.058	33.7369	0.507	0.795	0.925			0.355	0.419	0.356				31.3307	39.3401	34.3944	39.7265	32.8454	30.5955	29.9324	29.1394	24.049	31.315	29.3098	31.7227
7	25	2018	2018-07-25	20.3781	87.058	33.6497												36.7839	34.1321	38.9602	41.5999	36.4404	35.824	37.7369	40.9405	35.8913	40.6403	38.0627	60.0823
8	1	2018	2018-08-01	22.4536	4.85518	33.7747	0.873	0.535	0.845			0.334	0.425	0.333				16.1558	18.6223	20.8815	19.7791	14.7019		21.2098	19.6078	24.049	20.297	18.7726	22.1818
8	8	2018	2018-08-08	24.4558	53.7648	33.8401	0.626	0.595	0.91			0.391	0.489	0.403				13.0311	16.1521	14.3471	13.3486	12.7277	13.2074	17.0606	19.2431	24.1766	25.2751	18.7601	23.9965
8	15	2018	2018-08-15	20.0646	87.058	33.6419	1.3		0.971			0.463	0.548	0.404				30.02	29.252	21.0341	22.922	21.0349	19.6065	27.6946	52.1774	32.9535	26.2043	26.5577	23.0876
8	22	2018	2018-08-22	23.8928	87.058	33.7179	1.2	0.963	0.631			0.406	0.386	0.427				16.2128	20.8534	22.0806	15.1843	18.5244	15.2186	22.1464	23.007	31.3577	22.952	21.5122	30.3592
8	29	2018	2018-08-29	20.2967	87.058	33.5427	1.07	1.01	0.736			0.452	0.443	0.415				16.0284	27.1948	17.3913	17.0297	15.4186	16.6203	23.5052	21.8773	25.8709	23.5334	21.125	22.5807
9	5	2018	2018-09-05	22.5732	87.058	33.6921	0.866	0.333	0.593			0.389	0.386	0.398				31.6695	35.1424	40.9772	28.8671	29.9091	27.8578	32.2279	36.8555	39.9905	37.8662	42.2971	34.9483
9	12	2018	2018-09-12	22.3376	87.058	33.2923	1.48	1.49	1.57			0.325	0.313	0.374				24.4882	35.185	29.4183	37.9335	20.4597	34.6274	40.9505	24.6006	29.0592	35.4966	41.2355	38.0854
9	19	2018	2018-09-19	19.5522	5.36326	33.6691	0.816	0.576	0.951			0.425	0.391	0.443				32.3258	40.0783	31.8436	33.6484	28.9234	31.5688	41.4096	36.8555	45.4562	35.9612	29.3098	38.5398
9	26	2018	2018-09-26	19.4608	10.2074	33.6526	0.41	0.622	0.722			0.381	0.429	0.508				19.6211	23.772	21.6801	24.1212	19.3296	17.4644	23.9643	23.6928	22.6826	25.8452	34.7693	38.1399
10	3	2018	2018-10-03	18.2404	19.0153	33.5594	0.73	0.92	0.779			0.373	0.397	0.445				18.2382	15.0691	18.6917	19.0916	16.6644	17.9482	22.587	21.8773	19.9497	19.6997	20.1361	23.9965
10	10	2018	2018-10-10	20.4805	2.94466	33.7536	0.767	0.917	0.513			0.426	0.451	0.394				12.6111	29.0473	15.4433	36.3711	15.4578	31.6168	23.5052	19.154	20.8607	36.9415	35.2398	43.3263
10	17	2018	2018-10-17	16.8152	3.34138	33.6027	0.671	0.839	0.965			0.395	0.423	0.42				13.2856	14.8682	14.4672	12.836	22.5686	13.3799	22.587	18.7001	19.0388	19.3723	18.3021	20.187
10	24	2018	2018-10-24	18.2659	5.27104	33.5925	3.61	2.03	0.636			0.448	0.402	0.396				13.1653	18.8738	15.1187	16.8665	13.2287	17.3425	16.4474	22.0227	18.7601	21.5122	17.6338	19.4517
10	31	2018	2018-10-31	19.5269	43.1474	33.622	0.524	0.954	1.2			0.473	0.559	0.541				16.2412	20.9985	16.6548	17.7677	14.9653	18.6558	21.2217	20.6545	34.1504	19.6067	21.5122	24.451
11	7	2018	2018-11-07	19.6668	87.058	33.6101	0.34	0.702				0.517	0.404					20.8433	21.1863					19.3596	20.724	18.1883	26.7036	28.102	27.2926
11	14	2018	2018-11-14	18.0572	87.058	33.6059
11	21	2018	2018-11-21	18.5261	9.77416	33.7884
11	28	2018	2018-11-28	18.3413	27.6631	33.7183	1.1	1.01	1.18			0.46	0.478	0.469				24.8674	59.8711	23.0773	36.2453			18.9019	17.5357	20.0062	19.074
12	5	2018	2018-12-05	15.7012	72.3915	33.4994	4.48	2.25	2.16			0.674	0.622	0.635				26.5531	25.8845	16.1974	13.5868			26.2247	15.2583	14.5524	28.4989	40.2616
12	12	2018	2018-12-12	16.6313	87.058	33.5099
12	19	2018	2018-12-19	16.5381	87.058	33.2812	0.718	0.536	2			0.577	0.589	0.637				24.308						47.7354	43.9531	41.3667
12	26	2018	2018-12-26	16.1471	87.058	33.577
1	2	2019	2019-01-02	14.856	87.058	33.7074
1	9	2019	2019-01-09	15.7451	87.058	33.6206	0.593	0.882	0.446			0.491215	0.432915	0.487505				21.1224	17.1427	57.6621	29.1239	30.7353	25.2333	17.0713	15.2583	12.7345	15.4836	14.5914	17.2853
1	16	2019	2019-01-16	15.6725	87.058	33.3203	0.971	0.833	0.664			0.45544	0.791	0.657				17.9857	15.3121	27.3256	18.1574	17.8882	26.7667	12.9522	13.4365	16.8248	15.0348	15.9425	27.2926
1	23	2019	2019-01-23	15.0806	78.5859	33.3811												43.4409	19.3211		19.2422	24.2988	39.8667	31.2592	33.9327	25.9144	27.1524	30.8042	35.9352
1	30	2019	2019-01-30	15.6267	31.4859	33.6218												47.7355	20.6209	32.9154	17.2313	28.8853	27.5333	20.275	19.3576		20.8692	25.3999
2	6	2019	2019-02-06	14.9458	48.959	32.8452												15.8851	14.9661	26.0127	22.2943	41.4	41	26.6824	41.2203	56.3645	28.0501	29.9034	44.5779
2	13	2019	2019-02-13	15.1052	80.6513	33.4226
2	20	2019	2019-02-20															16.486	19.9547	30.5917	18.7746	33.1	29.7	34.4629	18.9021	19.5517	18.6252	19.9957	32.2962
2	27	2019	2019-02-27
3	6	2019	2019-03-06
3	13	2019	2019-03-13
3	20	2019	2019-03-20	15.3492	2.13382	33.5028	0.577	0.856	0.714			0.61709	0.429735	0.396875				15.322	28.9185	19.9062	18.4596	35.7667	25.9	24.8517	17.9912	18.6427	25.3572	23.5985	20.4694
3	27	2019	2019-03-27	15.3508	2.11294	33.5036												57.3862	24.6389	32.8475	23.1672	64.05	53.5	55.8134	57.048	57.278	57.5587	67.1476	59.3614
4	3	2019	2019-04-03	16.6581	4.9822	33.5672	0.220138					0.0835756	0.0802752					57.1303	60.151	54.101	50.5102			129.582	69.7921	63.9088	62.1816	47.6255
4	10	2019	2019-04-10	16.3156	4.34884	33.5561	0.473958	0.259625				0.250727	0.23318					46.4715	43.4882	43.5677	58.9295			98.6129	65.5114	72.4815	78.5409	98.6463	38.9829
4	17	2019	2019-04-17	16.3549	3.17782	33.6399	1.25666	0.515744				0.257994	0.225535					47.4401	57.1209	40.1039	47.6514			58.066	57.0944	47.4144	45.3512	47.4358	49.6043
4	24	2019	2019-04-24	15.8347	4.42018	33.5916	1.03949	1.00521	0.397828			0.243459	0.23318					30.8336	29.8964	24.3899	32.6318				61.2849	28.3761	43.5799	45.3512	26.7012
5	1	2019	2019-05-01	16.5809	3.99214	33.5875	0.651042					0.294331	0.172018					38.0921	34.5356	32.3406	32.5153				54.0023	35.3057	34.0249	38.9829	40.4535
5	8	2019	2019-05-08	16.0573	5.5999	33.6709	1.39062	0.505208	0.930898			0.274007	0.257994	0.248471				46.8813	56.2888	60.8321	73.7486			65.1489	48.9575	45.5516	66.2249	53.6981	34.4341
5	15	2019	2019-05-15	16.1755	4.67596	33.6628	0.266015	0.23001				0.199503	0.18532	0.164373				27.5415	28.5801	27.572	26.0255				27.6175	27.0162	25.7915	36.9624	36.7085
5	22	2019	2019-05-22	14.646	9.43834	33.5115
5	29	2019	2019-05-29	16.0757	12.2223	33.5416	0.609375	0.222584	0.921027			0.133278	0.18532	0.118502				133.754	124.137	110.485	137.743			156.116		116.995	109.951	125.484	45.3512
6	5	2019	2019-06-05	14.2961	17.5746	33.5676	0.682292	0.832182				0.224338	0.18532	0.149083				46.3115	40.2701	56.5146	51.5496			63.5302		54.2785	60.5174	62.1816	45.3512
6	12	2019	2019-06-12	19.3133	39.2828	33.5856
6	19	2019	2019-06-19	19.7903	14.0215	33.728	-0.0858835					0.141556	0.119913	0.0879205				62.3438	61.6603	52.2472	61.3213				81.5371	62.6281	82.318	82.7835	38.528
6	26	2019	2019-06-26	17.4184	25.2932	33.6709	0.359375	-0.0266535				0.240894	0.243459	0.172018				70.2893	64.7752	59.0286				62.5813	63.9265	55.1204	60.6792	63.1459	53.6981
7	3	2019	2019-07-03	19.6167	55.9955	33.7161	0.713542	0.168295	0.0523198			0.249172	0.221657	0.202599				27.0789	27.9479	30.4789	28.375			54.9451	50.9496	45.2839	53.6981	34.4341	47.4063
7	10	2019	2019-07-10	19.9956	73.9419	33.7189	0.418024	-0.092291	0.249753			0.199503	0.178052	0.103211				34.0483	23.5903	42.3242	38.6731			47.3851	49.8483	41.4319	45.2839	44.3156	64.9108
7	17	2019	2019-07-17	20.3841	3.42142	33.719	0.744792	0.266015	-0.0365252			0.186765	0.175399	0.180317				25.9423	30.1096	38.2051	44.806			52.0833	91.8401	39.5108	67.7219	37.7697	26.7012
7	24	2019	2019-07-24	19.0646	4.76644	33.6315	0.598958	0.0814332	-0.0858835			0.216176	0.190585	0.194081				98.2429	42.788	44.2415	38.192			106.314	66.1278	36.5864	50.9742	25.7915	49.6043
7	31	2019	2019-07-31	21.0497	12.017	33.6811	0.703125	0.682292	0.279368			0.0985294	0.0994685	0.0770819				27.2805	26.3747	40.6048	35.0847			85.6422	49.5891	50.2694	44.5735	76.8968	25.7915
8	7	2019	2019-08-07	19.305	87.058	33.5707	-0.0562685	-0.130435	0.0247046	0.0398104		0.142647	0.145027	0.152787				33.6375	43.9397	54.344	64.5757			100.408	127.059	46.188	60.2426	49.6043	75.0812
8	14	2019	2019-08-14	20.6638	3.81292	33.7429	0.279368	-0.0652174	0.776584	0.0777251		0.142647	0.15262	0.13214				31.5172	40.2492	42.6523				57.4527	50.9827	45.2741	63.2903	28.9756	86.4492
8	21	2019	2019-08-21	18.9386	5.51116	33.6416	0.486673	0.163043	0.303974	0.722275		0.216176	0.182992	0.187199				55.6026	69.7929
8	28	2019	2019-08-28	22.286	11.3924	33.739	0.0029615	0.130435	0.314715	0.409479		0.0838235	0.0690964	0.0633173				38.5862	42.7908					56.2599	79.7689	51.9473	38.528	41.7627	86.4492
9	4	2019	2019-09-04	20.0943	78.3911	33.6283	0.4077	-0.173913	0.26101	0.779147		0.186765	0.15262	0.166552				52.2868	43.9107					92.8909	64.8389	41.7094	55.5737	47.6255	64.0186
9	11	2019	2019-09-11	23.6985	79.5412	33.7472
9	18	2019	2019-09-18	22.3778	3.15346	33.7763
9	25	2019	2019-09-25	22.3279	3.54148	33.7596
10	2	2019	2019-10-02	20.9377	6.48208	33.7318	0.0029615	-0.26087	0.346939	0.475829		0.157353	0.129841	0.13214				24.9057	33.4687					52.0393	29.1455	28.8294	37.11	25.7915	36.7085
10	9	2019	2019-10-09	19.0379	3.82162	33.6859	-0.0167818	0.690655	1.41422			0.142647	0.122248	0.13214				24.0622	28.9038					38.528	99.1552	30.792	29.7558	41.7314	38.528
10	16	2019	2019-10-16	18.9388	3.93994	33.6791	0.220138	-0.173913	0.0891515	0.191469		0.230882	0.198178	0.235375				28.7448	41.7105					56.6212	67.9555	55.483	51.5057	77.0449	55.6319
10	23	2019	2019-10-23	18.6528	3.69112	33.6481	-0.00691017	-0.184783	0.722879	0.163033		0.0838235	0.0615034	0.0633173				24.7808	32.0449	37.891				62.4642	33.1079	31.8904	33.4128	34.4341	47.6255
10	30	2019	2019-10-30	19.5003	3.61108	33.7304	0.52616	1.18475	0.0872038	-0.152174		0.15	0.0918755	0.118376					21.4231	15.8055				18.5792	14.0128	29.7157	16.694	76.8968	28.9756
11	6	2019	2019-11-06	18.3282	53.6378	33.6957	0.180652	0.152174	2.2696	2.10616		0.179412	0.175399	0.173434				16.0753	28.3108	27.959				101.864	36.63	32.4558	29.2535	34.7804	76.8968
11	13	2019	2019-11-13	18.2737	3.18652	33.7462	0.723593	-0.282609	0.389903	0.134597		0.157353	0.160213	0.139023				24.422	27.2899					46.8034	26.9442	30.792	24.6321	36.7085	64.9108
11	20	2019	2019-11-20	17.9232	3.75724	33.6654
11	27	2019	2019-11-27	17.2335	21.6497	33.7124
12	4	2019	2019-12-04	16.5947	57.2274	33.4674
12	11	2019	2019-12-11	16.7282	4.3036	33.4287	-0.0463968	0.543478	0.164339	0.76019		0.186765	0.145027	0.166552				31.5221	37.297					84.2544	29.4315	28.902	26.7012	49.1813	38.9829
12	18	2019	2019-12-18	15.6301	3.27004	33.5158	0.950642	0.608696	0.615467	0.722275		0.292909	0.302902	0.378909				26.0912	34.7204					73.6505	27.1641	30.1827	28.9756	37.0879	62.1816
12	25	2019	2019-12-25	15.585	2.76892	33.3674
1	1	2020	2020-01-01	15.308	3.0421	33.4591
1	8	2020	2020-01-08	15.7621	4.48978	33.4545	0.328727	0.630435	2.73147	0.599052		0.253148	0.246285	0.306182				25.1559	27.4859					86.4492	38.9829	26.7012	26.7012	38.9829	49.6043
1	15	2020	2020-01-15	15.2604	3.0421	33.4462	2.28332	0.0652174	1.8507	1.30995		0.246521	0.239207	0.262545				39.094	37.5445					76.8968	47.6255	64.9108	64.9108	47.6255	38.9829
1	22	2020	2020-01-22	15.233	3.8512	33.521	1.15795	-0.23913	0.130435	0.295735		0.213386	0.239207	0.248				17.4687	38.1388	35.6261				53.6981	25.7915	64.9108	36.7085	47.6255	25.7915
1	29	2020	2020-01-29	15.8676	5.08486	33.4299	0.328727	-0.0869565	0.295735	1.78389		0.213386	0.23213	0.255273				27.5442	39.0897	42.9428				34.4341	26.7012	64.9108	150.181	47.6255	34.4341
2	5	2020	2020-02-05	13.7285	8.53528	33.5561	0.64462	0.347826	0.478261	0.314692		0.259775	0.253362	0.284364				15.6277	8.49167	20.9027	23.6441			38.9829	28.9756	76.8968	28.9377	62.1816	22.5635
2	12	2020	2020-02-12	14.7407	4.2253	33.5546	0.0113744	0.293478	0	0.551659		0.22664	0.23213	0.248				17.4164	12.3272	2.97139	18.2865			36.7085	53.6981	45.3512	34.4341	49.6043	38.9829
2	19	2020	2020-02-19	15.9034	2.88202	33.5872
2	26	2020	2020-02-26	16.0028	4.7734	33.6705												55.4665	48.3864	19.7761				62.1816	42.3316	62.1816	76.8968	62.6292	76.8968
3	4	2020	2020-03-04				-0.0957552	-0.130435	0.0872038	0.0872038		0.173625	0.147205	0.175273				18.84	6.91463	22.6177	23.1394			25.7915	86.4492	25.7071	36.7085	47.6255
3	11	2020	2020-03-11				-0.0562685	-0.206522	0.858696	0.295735	1.84076	0.200133	0.366596	0.204364				3.03318	3.77751	20.0119	21.78			28.9756	76.8968	49.6043	24.3225	24.0036	26.7012
3	18	2020	2020-03-18	16.2681	3.67372	33.7189
3	25	2020	2020-03-25	16.663	5.35978	33.0055
4	1	2020	2020-04-01	14.4471	5.72344	33.8771
4	8	2020	2020-04-08	15.6465	4.2514	33.5308	0.220138	0.478261	-0.282609	0.76019	0.0398104	0.233267	0.23213	0.240727				60.0774	47.0343	61.6641	44.9634			38.9829	44.5711	26.7012	76.8968	53.6981	36.7085
4	15	2020	2020-04-15	16.3157	4.08088	33.5827
4	22	2020	2020-04-22	14.929	9.60538	33.6689
4	29	2020	2020-04-29	17.9215	3.39184	33.9674	-0.0562685	-0.173913	-0.163043	1.34787		0.153744	0.161359	0.160727				25.6166	35.3039					49.6043	44.5076	45.3512	36.3222	53.6981
5	6	2020	2020-05-06	20.076	50.3631	34.0287
5	13	2020	2020-05-13	18.0418	19.3529	34.1144
5	20	2020	2020-05-20	16.727	18.321	34.0247	0.11155	-0.0543478	-0.0543478	1.33839	0.134597	0.259775	0.260439	0.269818				147.907						64.9108	34.4341	25.7915	53.6981	36.7085	62.1816
5	27	2020	2020-05-27	17.3486	51.2575	34.016
6	3	2020	2020-06-03	15.5858	4.78384	34.1068
6	10	2020	2020-06-10	16.2722	5.12836	34.1505
6	17	2020	2020-06-17	20.0615	3.88426	34.19	-0.0661402	-0.184783	0	0.11564	0.712796	0.107356	0.161359	0.102545				26.3746	30.1695					26.7012	47.6255	47.6255	33.0915	64.9108	86.4492
6	24	2020	2020-06-24	19.0795	7.6966	34.1421
7	1	2020	2020-07-01	20.2093	2.6419	34.1646
7	8	2020	2020-07-08	20.036	2.82808	33.6344	0.0523198	-0.347826	-0.25	0.0398104	1.54692	0.160371	0.161359	0.175273				32.5904	28.3674					25.7915	36.7085	52.0141	25.7915	47.6255	28.9756
7	15	2020	2020-07-15	22.6757	3.76072	33.6998	0.387957	-0.304348	-0.130435	0.191469	0.144076	0.0874751	0.0905874	0.0807273				39.3465	38.6653					47.6255	64.9108	28.9756	47.6255	62.1816	26.7012
7	22	2020	2020-07-22	15.116	5.60512	33.5275	0.437315	-0.0108696	-0.130435	0.191469	0.305213	0.246521	0.225053	0.240727										49.6043	38.528	34.4341	86.4492	53.6981	62.1816
7	29	2020	2020-07-29	17.8617	4.01824	33.5284	-0.154985	-0.195652	-0.195652	0.00189573	-0.0265403	0.101305	0.1367	0.146409				26.0033	26.4023					86.4492	76.8968	38.528	35.4112	64.9108	28.9756
8	5	2020	2020-08-05	20.0087	4.53502	33.5837	-0.135242	-0.0652174	-0.23913	-0.0454976	0.219905	0.0950901	0.12899	0.132597				40.5321						26.7012	53.6981	34.4341	26.7012	25.7915
8	12	2020	2020-08-12	17.1816	5.12836	33.5418	-0.12537	-0.336957	-0.0978261	0.163033	0.0966825	0.213801	0.21547					52.06	54.6167					62.1816	64.1899	28.9756	76.8968	76.8968	76.8968
8	19	2020	2020-08-19	23.1983	2.31826	33.7051	-0.0290011	0.121375	-0.0383451			0.126165	0.15212	0.153315				16.8364	15.4423					38.9829	34.4341	26.7012	53.6981	86.4492	86.4492
8	26	2020	2020-08-26	20.9702	3.54496	33.6039	0.0461869	0.626208	-0.0282543			0.0950901	0.1367	0.132597				35.735	36.4311	38.0872				28.9756	38.528	86.4492	62.1816	28.9756	34.4341
9	2	2020	2020-09-02	20.2323	3.07516	33.5547	0.121375	-0.0686176				0.113735	0.15212	0.153315				22.4281	21.3728	25.604				45.3512	25.7915	28.9377	36.7085	38.9829	38.528
9	9	2020	2020-09-09	21.7556	3.61978	33.6115	0.0461869	-0.0397422	-0.0686176			0.0515848	0.0750193	0.0773481				11.3852	10.0319					76.8968	38.528	20.1331	24.784	64.9108	62.1816
9	16	2020	2020-09-16	18.2831	4.93174	33.47	0.132116	-0.09889	-0.017418			0.07023	0.0981496	0.0980663				14.6712						36.7085	26.7012	25.7915	38.9829	49.6043	34.4341
9	23	2020	2020-09-23	19.1922	4.37668	33.4507	0.508056	0.207304	-0.139253			0.0950901	0.11357	0.118785										64.9108	36.7085	43.7066	46.9373	45.3512	86.4492
9	30	2020	2020-09-30	18.3836	16.2835	33.457	-0.0719656	0.228786	-0.169526			0.11995	0.1367	0.146409				25.9228						62.1816	28.9756	38.528	86.4492	36.7085	64.9108
10	7	2020	2020-10-07	20.3087	39.2672	33.5038	0.0859291	0.121375	-0.361251			0.0577999	0.0904395	0.0842541				46.7622	22.92					77.108	26.7012	38.9829	76.8968	38.2718	45.3512
10	14	2020	2020-10-14	20.9411	87.058	33.567	-0.0397422	1.88292	-0.0585267			0.07023	0.10586	0.0911602				22.9249	24.9374					45.3512	49.6043	49.6043	45.3512	45.3512	25.7915
10	21	2020	2020-10-21	22.1282	2.25562	33.6272	0.0461869	-0.0290011	-0.108981			0.101305	0.12899	0.139503				26.0511	32.4497					86.4492	28.9756	62.1816	38.528	38.528	26.7012
10	28	2020	2020-10-28
11	4	2020	2020-11-04				0.239527	0.497315	0.798104			0.0640149	0.0904395	0.0980663				12.9706	11.2707					38.528	62.1816	86.4492	28.9756	38.528	53.6981
11	11	2020	2020-11-11	15.0437	3.64762	33.4604	0.218045		0.76892			0.306401	0.337163	0.346685				30.2687	33.6628					86.4492	38.9829	38.528	37.7068	76.8968	36.7085
11	18	2020	2020-11-18	15.2173	1.44826	33.5043	0.615467	0.0998926	-0.0887992			0.213176	0.252352	0.256906				26.874	28.3107					28.9756	53.6981	33.553	34.4341	30.6936	45.3512
11	25	2020	2020-11-25	15.3084	1.45174	33.4666	0.615467	0.00322234	-0.0383451			0.223179	0.220833	0.185108				43.9298	40.4405					53.6981	34.4341	45.3512	49.6043	25.7915	49.6043
12	2	2020	2020-12-02	15.7635	1.4152	33.5673	0.894737	0.45435	-0.139253			0.201104	0.236859	0.20922				28.9591	31.7421					49.6043	45.3512	49.6043	45.3512	47.6255	28.9756
12	9	2020	2020-12-09	15.3651	0.058	33.5649	0.63695	0.121375	0.486377			0.311479	0.290278	0.32505				43.6567	37.0342					53.6981	34.4341	33.553	46.0143	49.6043	38.528
12	10	2020	2020-12-10															25.4431						36.7085	47.6255	25.7915	64.9108	53.6981	64.9108
12	16	2020	2020-12-16	15.382	26.3825	33.5941	0.375378	-0.0585267	-0.036019			0.326196	0.236859	0.341597				30.5015
12	23	2020	2020-12-23	15.894	47.1563	33.5827
12	30	2020	2020-12-30	14.9304	0.058	33.479
1	6	2021	2021-01-06	14.7612	38.82	33.462
1	13	2021	2021-01-13	14.7043	2.13382	33.4272	0.476287	0.486377	0.425832			0.365064	0.349921					50.7036	44.8794	64.7919				57.3317	54.7124	57.1779	54.014	55.8542
1	20	2021	2021-01-20	14.9019	0.058	33.5308												51.2456
1	21	2021	2021-01-21	15.0135	0.058	33.5317	-0.159435	-0.179617	-0.189707			0.282046	0.242201	0.2923				23.4657	8.77018	25.3579				24.3418	23.4352	22.2952	24.1339
1	27	2021	2021-01-27	14.3932	0.058	33.3191	1.667	2.40363	-0.179617			0.480721	0.493269	0.468458				41.7195	62.2731					59.1108	55.1078	60.3621	55.3584	59.0537	48.9981
2	3	2021	2021-02-03				0.27447	0.234107	0.0625631			0.282046	0.343697	0.336081				35.6704	25.7074	53.4851				48.4362	46.2123	48.9902	47.6255	48.541	46.2557
2	10	2021	2021-02-10
2	11	2021	2021-02-11				-0.129162	0.0625631	-0.21998			0.259971	0.252885	0.225767				43.7911	40.9568	49.0712				49.3257	71.031	50.8097	58.1513	45.3415
2	17	2021	2021-02-17
2	24	2021	2021-02-24	14.7538	0.058	25.3038
2	25	2021	2021-02-25	14.7454	0.058	25.2742	0.456105	0.738648	1.79336			0.21582	0.263568	0.46434				42.1556	39.8034	85.5946				44.878	49.2729	65.8206	54.9334	56.7683
2	29	2021	2/29/21	14.6942	0.058	33.4641												18.4646
3	3	2021	2021-03-03	14.2435	4.10698	33.4861	-0.076087	1.64682	0.779011	2.38104		0.355629	0.343697	0.382897				39.0458	62.0987	52.5089				34.3143	43.3801	34.2472	38.3845
3	10	2021	2021-03-10	15.1935	4.77862	33.4202	1.19273	1.21292	1.23412			0.539588	0.562714	0.705634				60.8432						47.9914		40.3475	37.4651	38.0284
3	17	2021	2021-03-17	14.0263	6.28894	33.2813												59.0185	87.9272
3	19	2021	2021-03-19	12.5275	4.11916	33.5036	5.77397	5.48057				0.70883	0.765705	0.843527				46.187	144.433	141.879				31.9794	75.1228	65.3657	87.6547	55.3971	64.0815
3	24	2021	2021-03-24	14.7279	9.08686	33.4493
3	31	2021	2021-03-31	15.4184	45.3398	33.5228	0.279713	-0.222336				0.223179	0.199466	0.187157				25.6896	27.6263	7.01055	68.3864	51.9109		35.2208	27.9682	29.6503	24.1339
4	5	2021	2021-04-05	16.5021	3.77986	33.565						0.109937	0.366133	0.0437883				41.4521	17.2824	20.6352	67.7976	110.128		38.2063	37.1634	40.3137
4	7	2021	2021-04-07	16.4379	5.55466	33.5653						0.179029	0.0502874					66.9329	61.0128	52.913	21.3345	52.3325		22.6391	49.5902	46.1245	51.9454	44.9759
4	14	2021	2021-04-14	17.0966	4.88128	33.5765	0.294652	-0.129162	-0.0788934			0.201104	0.225767					39.7731	37.9954	16.2303				47.9469	25.2484	47.944	25.0533	25.2304
4	21	2021	2021-04-21	17.1056	7.44604	33.5851	-0.0584016					0.238774	0.27194					29.2055						132.454	59.5627	30.7951	30.5697	32.5435
4	28	2021	2021-04-28	15.5974	7.26508	31.0561	5.73649					0.369175						66.1047	155.665	145.662				74.678	72.3908	58.5426	64.1273	58.1395
5	5	2021	2021-05-05	17.3018	4.38538	33.5927
5	12	2021	2021-05-12	18.7077	3.24568	33.6016	-0.0891393					0.161838	0.116212					79.7617	90.3188	92.295				96.0273	86.29		84.1926
5	19	2021	2021-05-19	15.9741	8.6362	33.5146	0.58709	0.0645492				0.198188	0.16078					22.6177	62.7045	71.1473				35.6741	34.2472
5	26	2021	2021-05-26	17.7651	87.058	33.4584
6	2	2021	2021-06-02	17.5258	3.31354	33.5565	0.0543033					0.170609	0.144067					58.6031	47.0365	63.3184				26.0291	31.4624	32.6009	41.2269	102.907	55.5433
6	9	2021	2021-06-09	19.5683	3.30484	33.6199	-0.0686475	-0.00717213				0.225767	0.171922	0.223631				20.069	31.1117	34.4643				40.1523	46.1178	41.4471	32.3967	42.8705	58.4932
6	16	2021	2021-06-16	18.7398	2.12512	33.5554	-0.526602	0.0423814	0.219905			0.187157	0.155209					20.4815	33.0882	34.5333				33.2691	33.3105	30.6265	33.7801	34.2943	30.1547
6	23	2021	2021-06-23	17.8539	5.4694	33.5166	-0.0887992	1.32392	-0.064455			0.520595	0.262983					49.3742	66.2637	62.3669				66.147	63.6727	66.7985	65.8955
6	30	2021	2021-06-30	20.227	5.46592	33.5578
7	7	2021	2021-07-07	19.4646	2.69584	33.4022	-0.189707	-0.0170616	-0.036019			0.190925	0.191425					32.6034	38.5616					37.4271	34.8138	35.6433	51.8982	35.6467	37.4654
7	14	2021	2021-07-14	20.0244	2.06944	33.4601	-0.0686475	0.123108	-0.35116			0.509153	0.079023					22.5806	26.3868	19.8876	25.206	30.2416		31.0449	29.6772	27.4171	29.7095	42.07	21.097
7	21	2021	2021-07-21	20.3828	4.27228	33.4362
7	28	2021	2021-07-28	18.8915	29.0812	33.4131	-0.09889	3.54692				0.41762						41.5786	39.936	43.8965	47.1944			44.5135	43.3645	45.1069	45.646	45.6275	43.7895
8	4	2021	2021-08-04	16.8651	4.15918	33.3976	0.536458	0.390625				0.205348	0.21558	0.160441				58.8182	56.4395	63.0864	68.2129			59.8844	63.0965	62.4909	62.4909	61.3446	63.637
8	11	2021	2021-08-11	19.1138	1.95982	33.4324
8	18	2021	2021-08-18	18.7877	0.058	33.3555	-0.320304	-3.09119				0.0626006	0.0742337					11.3614	13.4224	29.7064				19.8676	24.6299	24.9504	29.3169	27.9674	27.8633
8	25	2021	2021-08-25	17.3156	4.0165	33.4016
9	1	2021	2021-09-01	17.0193	1.93198	33.4208	-0.34202	-0.0584016	-0.104189			0.0939276	0.135064	-0.0167625				112.306	105.347	112.93	116.947			119.539	120.59	115.93	125.513	120.53	147.952
9	8	2021	2021-09-08	19.5862	1.5718	33.4425
9	15	2021	2021-09-15	17.9489	2.98816	33.4117	0.786458	-0.0481557				0.247786	0.0359195					31.0156	28.1192	19.5193	34.5064
9	22	2021	2021-09-22	19.2302	11.0183	33.4196	-0.0891393	0.310451	-0.324795			0.376113						22.6014	35.8579					35.5635	34.6811	35.0592	39.3946	39.3376
9	29	2021	2021-09-29	19.8611	0.93496	33.508						0.208486	0.199477					9.98749	11.1036	27.4628				22.3825	26.0005	26.3288	25.1942	25.5832	26.9468
10	4	2021	2021-10-04	18.0212	1.67968	33.4274	-0.324795	-0.335041				0.242563	0.203248	0.121783				36.2622	43.3242	37.6372				41.9986	42.9048	39.6541	42.6011	35.1918	46.1043
10	6	2021	2021-10-06	18.458	1.48306	33.3841	1.26332	0.0133197				0.532037	0.251934	0.336358				25.0585	34.1549	22.2838	33.861	44.4291	30.9509	25.1185	36.0594	37.0452	27.4171	38.862	27.4625
10	8	2021	2021-10-08	17.564	1.85716	33.4136	0.0440574	0.126025	-0.109631			0.251934	0.239916	0.183374				35.222	39.3433	32.9841	45.2354			35.9629	39.2498	35.0592	33.4396	38.804	39.2842
10	11	2021	2021-10-11	18.012	1.40128	33.2696	-0.00717213	0.0543033				0.532037	0.268508	0.376113				44.7788	50.2526	33.8512	59.6442	44.0913		39.4837	41.4471	43.4639	52.9267	57.3165	55.1979
10	13	2021	2021-10-13	15.0032	1.0933	33.3888	0.576844	2.11373				0.812357	0.517127	0.52833				34.5536	34.6466	90.5499	40.4725			42.4468	43.8185	43.7895	41.074	42.4162	36.5706
10	15	2021	2021-10-15	14.963	2.17906	33.3943	0.609375	1.27604				0.743707	0.412155	0.423618				80.035	65.2885	94.7482				84.2488	83.0771	90.2289	78.4555	77.3914	75.066
10	18	2021	2021-10-18	14.9643	1.79626	33.3852	0.546875	0.115779				0.329282						61.7932	30.8197					25.9033	29.1391	27.2654	31.9399	33.2212	29.251
10	20	2021	2021-10-20	17.3315	1.03414	33.459	0.567708	0.473958				0.543478	0.268508	0.28982				21.4159	32.0591					42.9057	33.2691	35.0425	41.4921	31.8427
10	22	2021	2021-10-22	16.5169	0.86188	33.3984	0.713542	0.115779	0.105533			0.76087	0.412155	0.391828				50.0431	43.0954	63.2281	58.953			48.5373	53.5671	57.0012	59.809	54.4674	61.3446
10	25	2021	2021-10-25	17.0224	1.99288	33.3992	0.167008	-0.0481557				0.497712	0.251934	0.278185				68.5451	62.0622	54.5301	77.8138	66.6818		57.5909	68.8955	68.6803	66.6028	62.2616	43.4448
10	27	2021	2021-10-27	17.0753	3.9295	33.36	0.567708	0.146516				0.32234	0.247786	0.102969				109.776	108.766	128.399	122.542	133.134	259.379	336.492	205.121	391.231	238.405	155.584	267.569
10	29	2021	2021-10-29	16.9071	2.70454	33.3634	0.0338115	-0.017418				0.480549	0.207735	0.224201				106.212	205.202	42.4446	101.222			86.6612	103.983	100.211	88.8534	99.3547	126.582
11	3	2021	2021-11-03	17.1559	4.2949	29.5213	0.13627					0.640732	0.329282	0.339445				77.5355	76.4189	61.9496	75.8619			182.865	100.461	132.409	114.061	209.932	117.943
11	10	2021	2021-11-10	17.2583	0.91408	28.7962	0.244198	0.0423814	0.409479			0.294485	0.203544					70.3197	62.2851	86.89				96.3202	106.41	112.694	131.926	95.2722	107.486
11	17	2021	2021-11-17	16.9741	1.52134	29.0149	0.125118	0.144076				0.283343	0.222701					30.8368	34.5557	41.5468	33.0411			34.1869	31.8401	31.5434	25.6523	31.5434	35.1958
11	24	2021	2021-11-24	17.0634	0.7105	33.5034	0.453125	0.557292				0.161838	0.175322											13.3289	20.5181	20.0814	22.8392	25.1247	24.2798
12	1	2021	2021-12-01	16.3967	0.8149	33.5235	-0.222584	-0.428882	0.177254			0.243281						24.7888	21.2772	25.7876				25.4731	24.2142	27.0988	66.5106	23.8914	29.2382
12	8	2021	2021-12-08	16.6954	0.5887	33.5485	0.126025					0.263889	0.768678					15.6923	13.9418	3.23777				12.323	17.6585	16.8721	19.2392	33.8372	18.6978
12	15	2021	2021-12-15	14.8919	1.75102	32.2799	1.10938	1.03692	1.14037			0.778032	0.401105	0.912356				30.1769						30.9747	32.7551	33.3773	29.2214	35.6697	59.4845
12	22	2021	2021-12-22	15.2439	1.67098	33.4007	-0.017418	0.0645492	0.0543033			0.334807	0.370875					43.7111	48.2411					40.6182	36.6461	37.901	37.9621	37.9454	30.1547
12	29	2021	2021-12-29	14.6211	2.9029	32.8407	1.75512					0.35516						21.3839						28.3096	14.6585	19.3885	22.8323	31.9878	18.8237
1	5	2022	2022-01-05	14.5427	43.4867	30.5626	1.9293	2.15471	0.720287			0.307182	0.365445					103.103						48.2169	45.2303	48.9233	89.195	55.7467	54.274
1	12	2022	2022-01-12	14.6064	87.058	30.2621	-0.0271444	-0.0488599				0.830939	0.361337	0.263889				267.584	263.728					197.189	188.459	230.931		202.395	211.508
1	19	2022	2022-01-19	15.2898	87.058	31.1507	-0.114007	-0.0787084	0.203835			0.394532	0.339053					69.3856	33.0908					48.2169	46.144	46.1953	51.9926	28.8973	29.6853
1	26	2022	2022-01-26	15.0938	87.058	33.1508	0.0338115					0.726545	0.312707	0.318491				63.9894	60.1458					68.2314	68.0738	73.4759	94.6392	58.0221	65.4506
