# Supplementary material for: Coastal nitrogen drives respiration quotient in the Southern California Bight
Source: Copernicus journal article supplement (doi:10.5194/bg-22-7915-2025), 2025-12-10
Supplement: Supplementary file [file bg-22-7915-2025-supplement-title-page.pdf › bg-22-7915-2025-supplement-title-page.pdf]

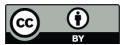

*Supplement of*

**Coastal nitrogen drives respiration quotient in the Southern California Bight**

**Allison R. Moreno et al.**

*Correspondence to:* Allison R. Moreno (amoren53@ucsc.edu)

- bg-22-7915-2025-supplement-title-page.pdf
- Final\_Supplementary\_Moreno\_CoastalRespirationQuotient.pdf
- Table S1.xlsx

The copyright of individual parts of the supplement might differ from the article licence.
